# Supplementary material for: In situ growth and optical gas adsorption performance of Zn(ii) metal–organic framework membranes at room temperature
Source: Royal Society of Chemistry journal article supplement (doi:10.1039/c9an00278b), 2019-01-01
Supplement: c9an00278b1.pdf [file c9an00278b1.pdf]

## Supplementary Information

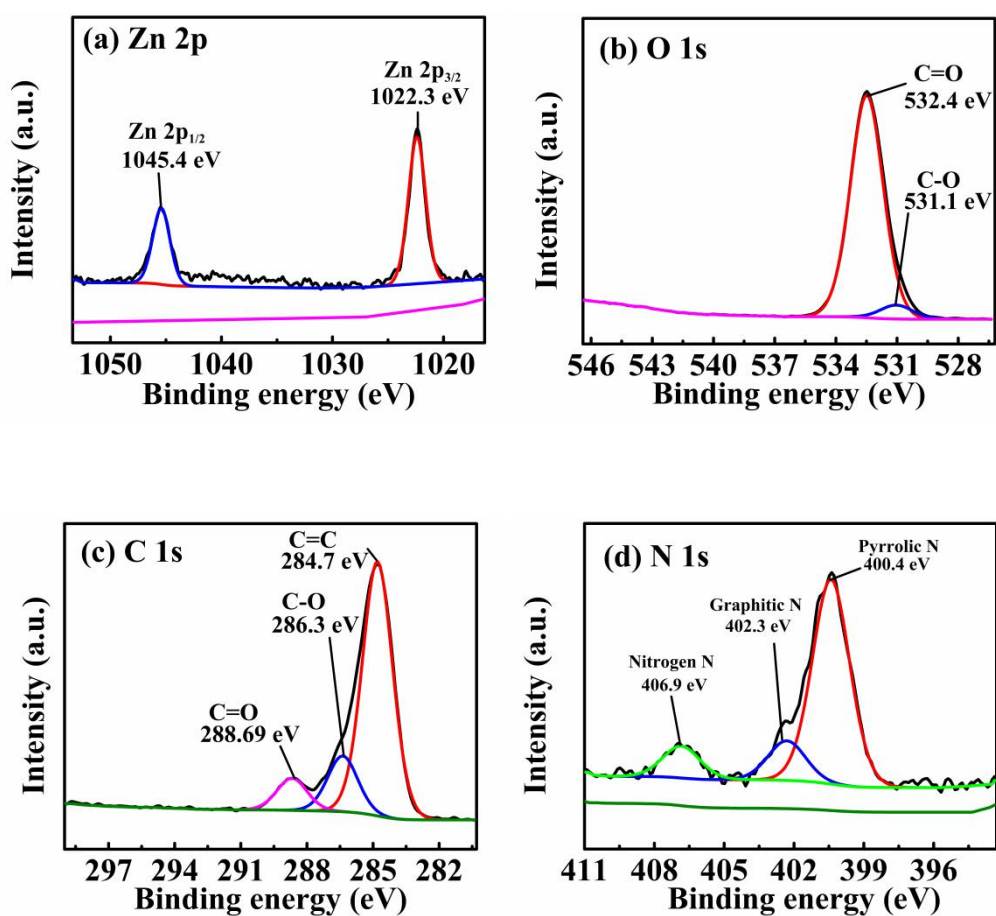

Fig. S1 Gas adsorption mechanism of  $[\text{Zn}_2(\text{bdc})_2(\text{dpNDI})]_n$  thin film. (a) Zn 2p spectra; (b) O 1s spectra; (c) C 1s spectra; (d) N 1s spectra of  $[\text{Zn}_2(\text{bdc})_2(\text{dpNDI})]_n$  thin film.

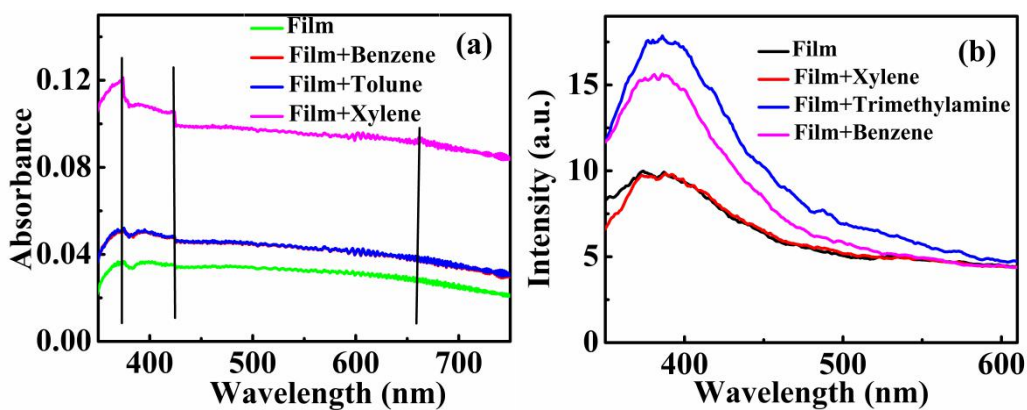

Figure S2. Optical properties of  $[\text{Zn}_2(\text{bdc})_2(\text{dpNDI})]_n$  thin film after exposure to 10000 ppm of several VOCs. (a) UV-vis absorption spectra; (b) Fluorescence emission spectra under 316 nm of excitation.

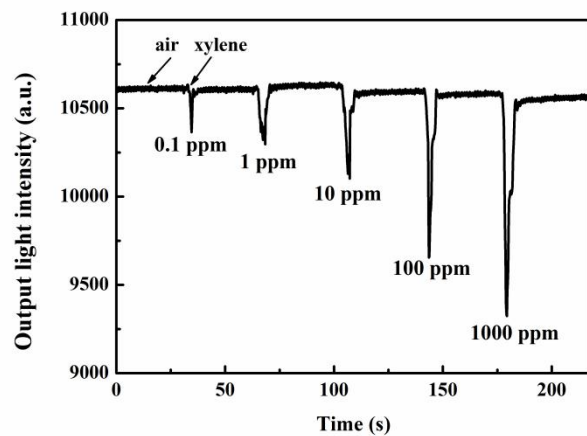

Fig. S3 The Dynamic adsorption curve of  $[\text{Zn}_2(\text{bdc})_2(\text{dpNDI})_n]$  thin film POWG to different concentration of xylene.

---

**Table S1** Absorbance change of sensitive film after exposure to 10000 ppm of VOCs.

---

| Abs.          | Abs. (650 nm) | $\Delta$ Abs. = Abs. (exposure) - Abs (film) |
|---------------|---------------|----------------------------------------------|
| Film          | 0.03          | 0.00                                         |
| Film +Benzene | 0.04          | 0.01                                         |
| Film+ Toluene | 0.04          | 0.01                                         |
| Film+ Xylene  | 0.03          | 0.06                                         |
